# Supplementary material for: Plant-inspired quercetin thin films: universal coatings and their postfunctionalization for non-biofouling applications
Source: Royal Society of Chemistry journal article supplement (doi:10.1039/d1nj00593f), 2021-01-01
Supplement: d1nj00593f1.pdf [file d1nj00593f1.pdf]

## Supplementary Information

### Plant-Inspired Quercetin Thin Films: Universal Coatings and their Postfunctionalization for Non-Biofouling Applications

*Soojeong Cho,<sup>a</sup> Hyeon Min Shin,<sup>a,‡</sup> Yeonwoo Jeong<sup>b,‡</sup> Sunhee Kim,<sup>a</sup> Ji Hwan Eom,<sup>a</sup> Byunghyuck*

*Jung,<sup>c,\*</sup> Sung Min Kang<sup>b,\*</sup> and Woo Kyung Cho<sup>a,\*</sup>*

<sup>a</sup>Department of Chemistry, Chungnam National University, Daejeon 34134, Korea

<sup>b</sup>Department of Chemistry, Chungbuk National University, Cheongju, Chungbuk 28644, Korea

<sup>c</sup>Department of Emerging Materials Science, Daegu Gyeongbuk Institute of Science and Technology (DGIST), Daegu 42988, Korea

\*Corresponding Authors

E-mail: wkcho@cnu.ac.kr, byunghyuck.jung@dgist.ac.kr, smk16@chungbuk.ac.kr

‡These authors equally contributed to this work.

## CONTENTS

- **Figure S1.** UV–vis calibration curve of quercetin (in ethanol).
- **Figure S2.** Photographs of the prepared solutions before (0 h) and after (24 h) coating. The concentration of quercetin in each solution is provided at the top.
- **Figure S3.** Photographs of pH-indicator papers that were soaked with the prepared coating solutions. The quercetin concentration was varied.
- **Figure S4.** Proposed coating mechanism of quercetin and DETA on solid substrates.
- **Table S1.** Atomic composition (%) of the bare, quercetin-coated, quercetin/DETA-coated Ti/TiO<sub>2</sub> substrates.
- **Figure S5.** DLS particle size distribution of the coating solution of quercetin and DETA.
- **Figure S6.** (a) Thickness of the films prepared with quercetin and DETA before (black) and after (light gray) exposure to different pH environments for 1 h and (b) thickness evolution of the films over time after immersion in PBS (pH 7.4). 0 h indicates the as-prepared film.
- **Figure S7.** Photographs of the quercetin/DETA-coated Ti/TiO<sub>2</sub> substrates. The quercetin concentration was varied, and the scale bars represent 2 mm.
- **Figure S8.** Photographs of the static water contact angles onto various substrates before and after coating with quercetin and DETA.
- **Figure S9.** XPS spectra of various substrates i) before and ii) after coating with quercetin and DETA.
- **Figure S10.** Photographs of various substrates before and after coating with quercetin and DETA. The scale bars represent 2 mm.
- **Figure S11.** Static water contact angles of the (a) initiator-immobilized and (b) poly(MPDSAHA)-grafted Ti/TiO<sub>2</sub> substrates.
- **Figure S12.** Underwater superoleophobicity of the poly(MPDSAHA)-grafted substrate. Hexadecane was used as an oily liquid.

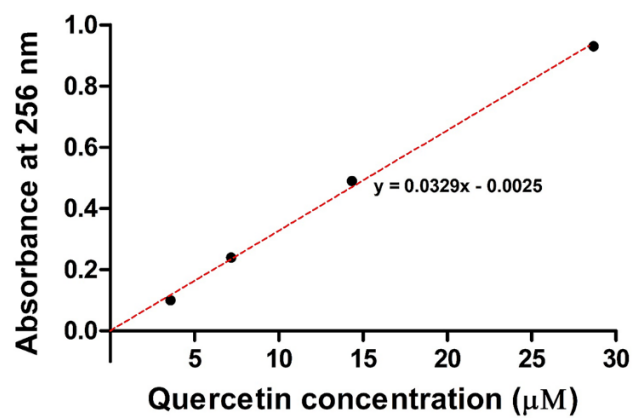

**Figure S1.** UV-vis calibration curve of quercetin (in ethanol).

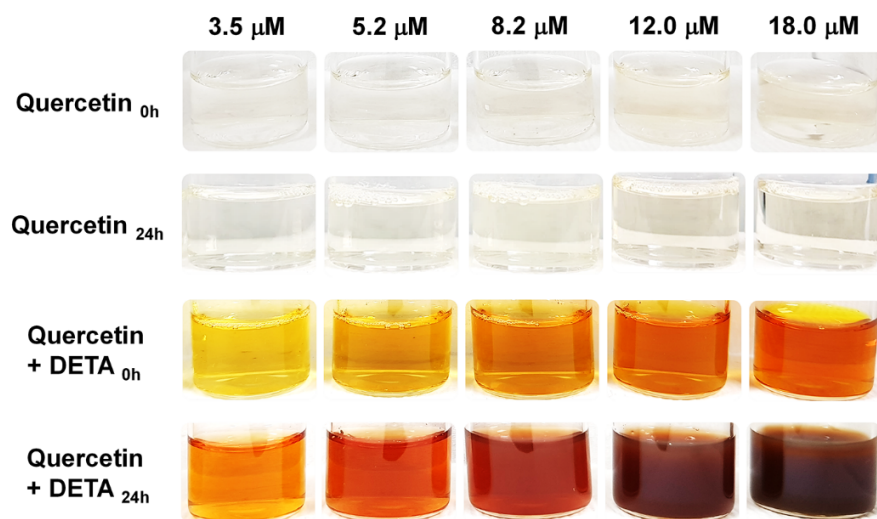

**Figure S2.** Photographs of the prepared solutions before (0 h) and after (24 h) coating. The concentration of quercetin in each solution is provided at the top.

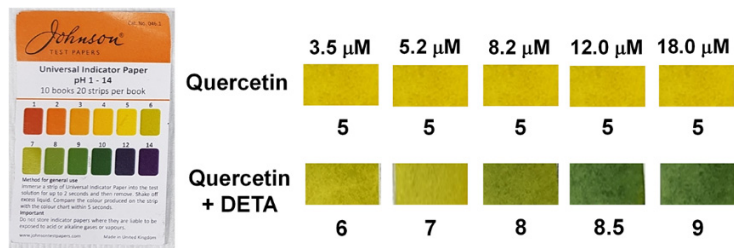

**Figure S3.** Photographs of pH-indicator papers that were soaked with the prepared coating solutions. The quercetin concentration was varied.

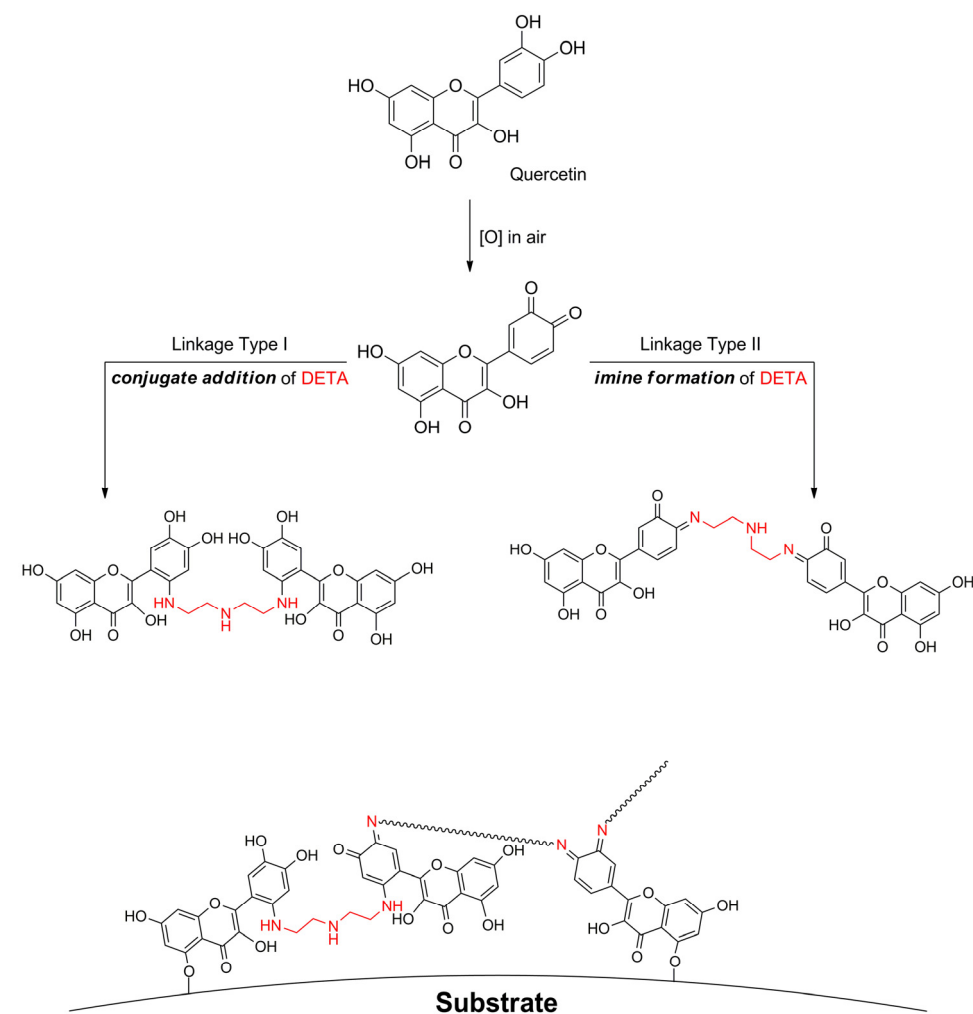

**Figure S4.** Proposed coating mechanism of quercetin and DETA on solid substrates.

|                  | Atomic composition (%) |       |       |       |
|------------------|------------------------|-------|-------|-------|
|                  | C 1s                   | N 1s  | O 1s  | Ti 2p |
| Bare             | 24.27                  | 0.00  | 50.17 | 25.56 |
| Quercetin        | 28.01                  | 1.48  | 49.53 | 20.99 |
| Quercetin + DETA | 66.79                  | 11.17 | 22.04 | 0.00  |

**Table S1.** Atomic composition (%) of the bare, quercetin-coated, quercetin/DETA-coated Ti/TiO<sub>2</sub> substrates.

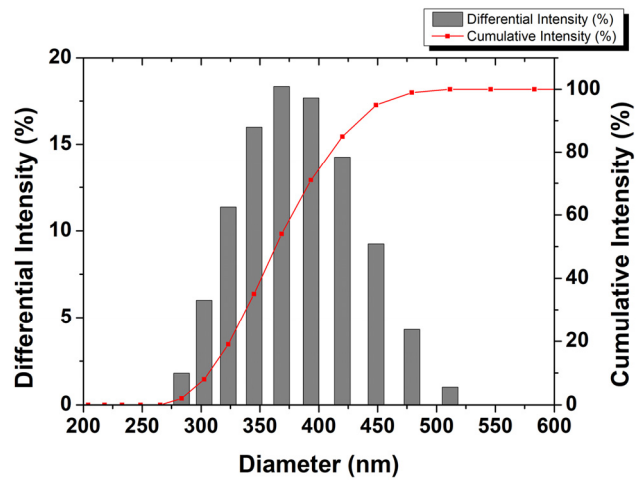

**Figure S5.** DLS particle size distribution of the coating solution of quercetin and DETA.



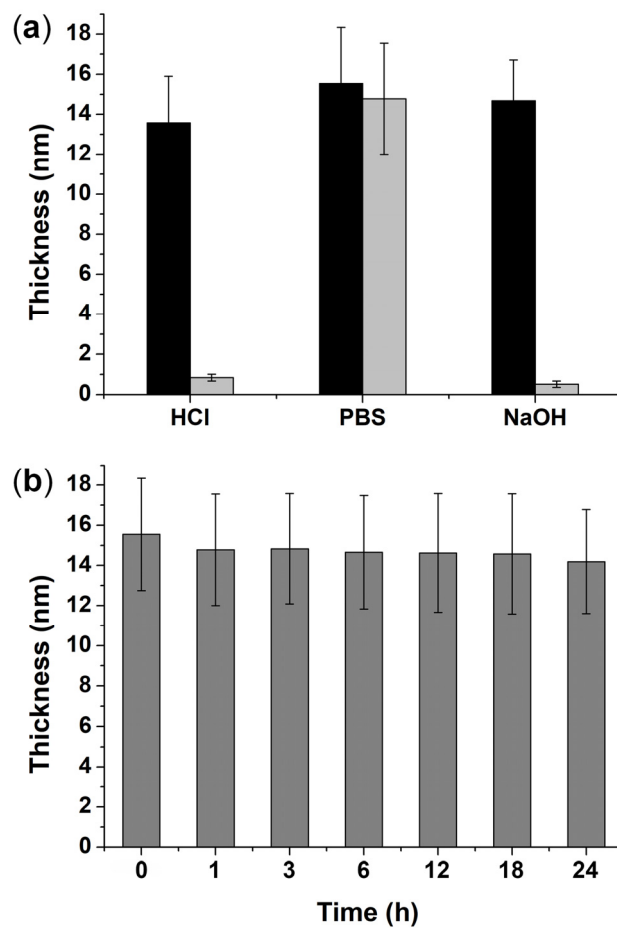

**Figure S6.** (a) Thickness of the films prepared with quercetin and DETA before (black) and after (light gray) exposure to different pH environments for 1 h and (b) thickness evolution of the films over time after immersion in PBS (pH 7.4). 0 h indicates the as-prepared film.

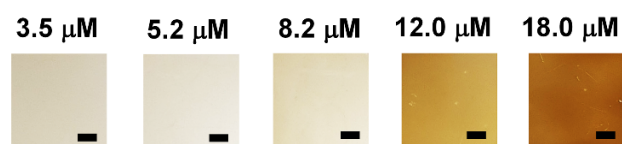

**Figure S7.** Photographs of the quercetin/DETA-coated Ti/TiO<sub>2</sub> substrates. The quercetin concentration was varied, and the scale bars represent 2 mm.

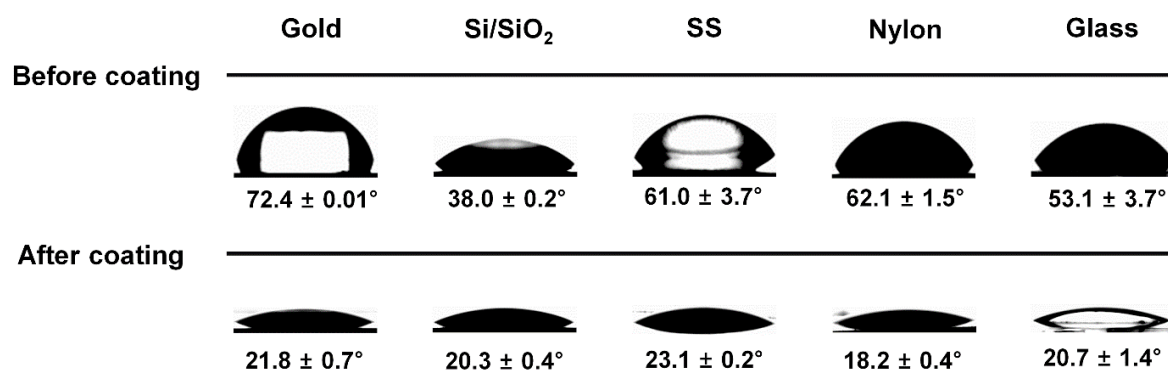

**Figure S8.** Photographs of the static water contact angles onto various substrates before and after coating with quercetin and DETA.

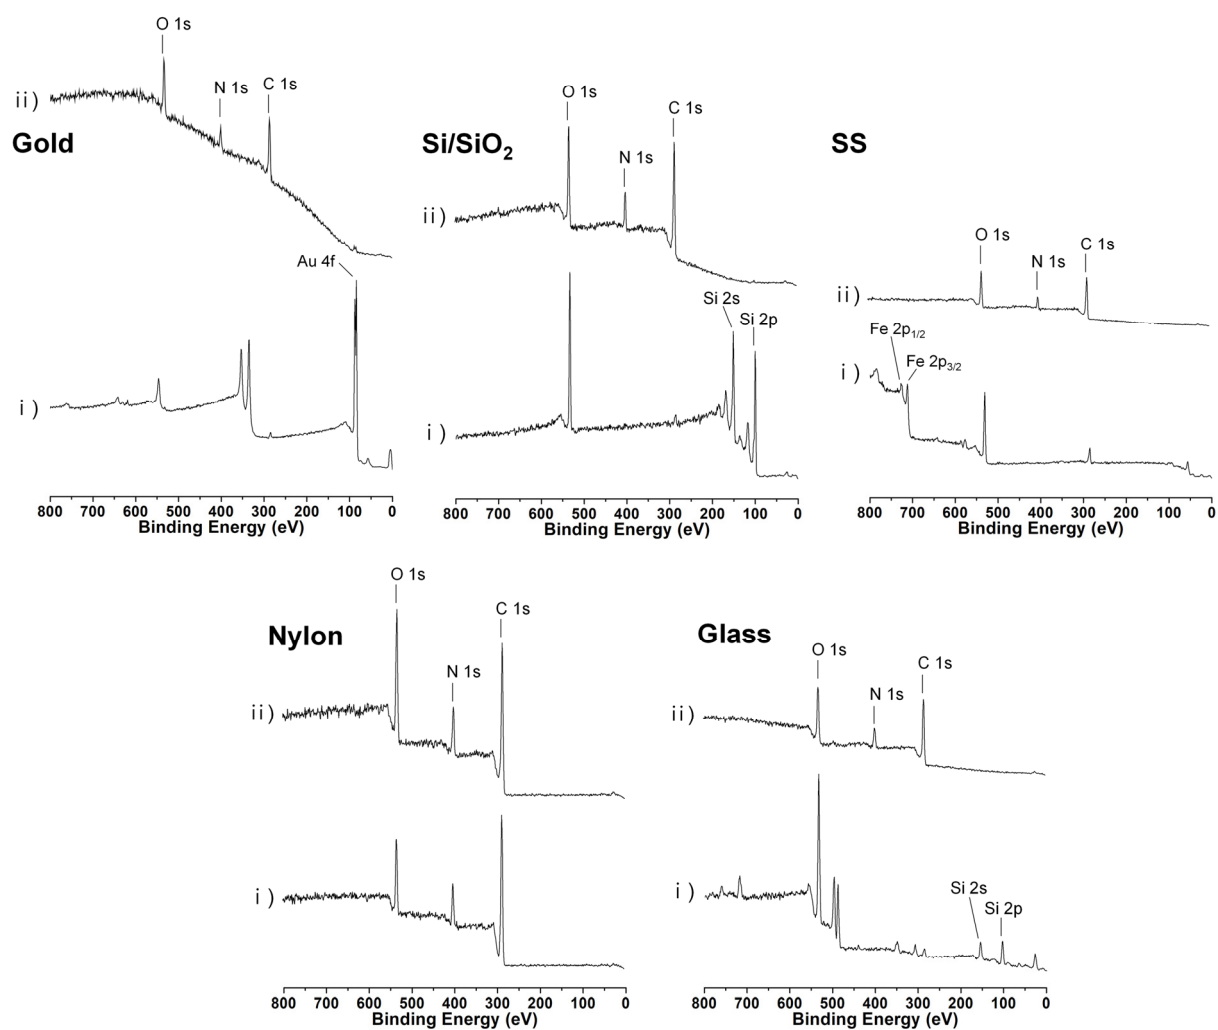

**Figure S9.** XPS spectra of various substrates i) before and ii) after coating with quercetin and DETA.

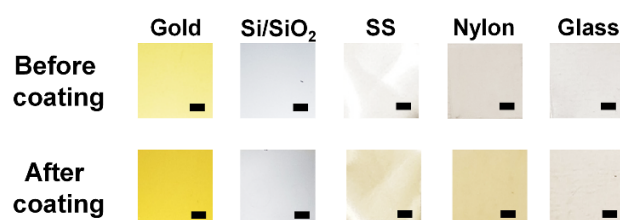

**Figure S10.** Photographs of various substrates before and after coating with quercetin and DETA. The scale bars represent 2 mm.

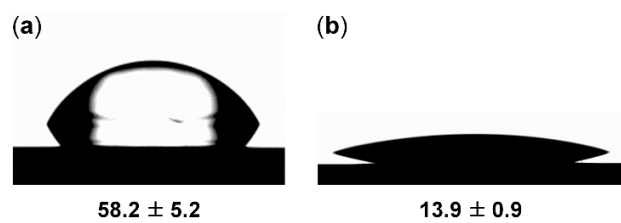

**Figure S11.** Static water contact angles of the (a) initiator-immobilized and (b) poly(MPDSAH)-grafted Ti/TiO<sub>2</sub> substrates.

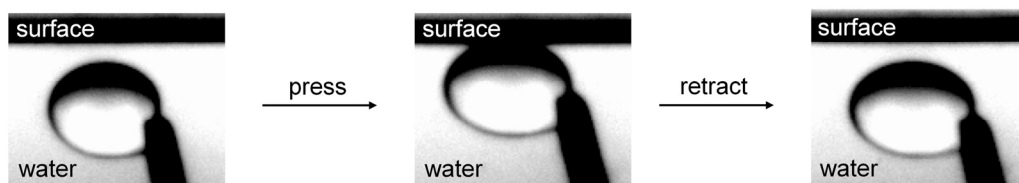

**Figure S12.** Underwater superoleophobicity of the poly(MPDSAH)-grafted substrate. Hexadecane was used as an oily liquid.
